# Supplementary material for: Dyadic approach to post-stroke hospitalizations: role of caregiver and patient characteristics
Source: PubMed Central journal article supplement (PMC6829975; doi:10.1186/s12883-019-1510-4), 2019-11-04
Supplement: 12883_2019_1510_MOESM1_ESM.pdf [file 12883_2019_1510_MOESM1_ESM.pdf]

## Sensitivity Analysis

Comparison of effect estimates of association of caregiver and patient characteristics with rehospitalization 0-3 months post-stroke across the final adjusted model without and with addition of length of stay for index stroke episode.

|                                     | Reference category (if applicable) | aIRR* (95% CI) | P-value | aIRR# (95% CI) | P-value |
|-------------------------------------|------------------------------------|----------------|---------|----------------|---------|
| <b>CAREGIVER FACTORS</b>            |                                    |                |         |                |         |
| Age (in years)                      |                                    |                |         |                |         |
| Gender                              | Male                               |                |         |                |         |
| Ethnicity                           | Non-Chinese                        |                |         |                |         |
| Marital Status                      | Single                             |                |         |                |         |
| Caregiver identity                  | Spouse                             |                |         |                |         |
| Adult-child                         |                                    |                |         |                |         |
| Sibling                             |                                    |                |         |                |         |
| Others                              |                                    |                |         |                |         |
| Comorbid Conditions                 | None                               |                |         |                |         |
| 1                                   |                                    |                |         |                |         |
| 2                                   |                                    |                |         |                |         |
| ≥3                                  |                                    |                |         |                |         |
| Co-residing with patient            | No                                 |                |         |                |         |
| Caring for multiple care recipients | No                                 |                |         |                |         |
| Memory problems                     |                                    |                |         |                |         |
| Depressive behavior problems        |                                    |                |         |                |         |

|                                              |              |                      |       |                      |       |
|----------------------------------------------|--------------|----------------------|-------|----------------------|-------|
| Disruptive behavior problems                 |              |                      |       |                      |       |
| Oberst Caregiving Burden Scale               |              |                      |       |                      |       |
| Zarit Burden Interview                       |              |                      |       |                      |       |
| Family conflict - Attitude towards patient   |              |                      |       |                      |       |
| Family conflict - Attitude towards caregiver |              |                      |       |                      |       |
| Social support - FDW for general help        | No           | 0.342 (0.180, 0.651) | 0.001 | 0.342 (0.177, 0.658) | 0.001 |
| Social support - FDW for stroke patient      | No           |                      |       |                      |       |
| Social Support (perceived)                   |              |                      |       |                      |       |
| Care management strategies - Positive        |              |                      |       |                      |       |
| Care management strategies - Negative        |              |                      |       |                      |       |
| <b>STROKE PATIENT FACTORS</b>                |              |                      |       |                      |       |
| Age (in years)                               |              |                      |       |                      |       |
| Gender                                       | Male         |                      |       |                      |       |
| Ethnicity                                    | Non-Chinese  |                      |       |                      |       |
| Marital Status                               | Single       |                      |       |                      |       |
| Ward Class                                   | Unsubsidized |                      |       |                      |       |
| CCI                                          | 1 - 3        |                      |       |                      |       |
| 4 - 6                                        |              |                      |       |                      |       |
| ≥7                                           |              |                      |       |                      |       |
| Stroke type                                  | Non-ischemic |                      |       |                      |       |
| Recurrent stroke                             | No           | 2.099 (1.136, 3.877) | 0.018 | 2.097 (1.133, 3.880) | 0.018 |
| National Institute of Health Scale           | Mild (0-4)   |                      |       |                      |       |
| Moderately severe (5-14)                     |              |                      |       |                      |       |

|                                                      |                                 |  |  |  |  |
|------------------------------------------------------|---------------------------------|--|--|--|--|
| Severe (15-24)                                       |                                 |  |  |  |  |
| Modified Rankin Scale                                | No or slight disability (0-2)   |  |  |  |  |
| Moderate or severe disability (3-5)                  |                                 |  |  |  |  |
| Mini-Mental State Examination                        | No cognitive impairment (24-30) |  |  |  |  |
| Mild cognitive impairment (18-23)                    |                                 |  |  |  |  |
| Severe cognitive impairment (1-17)                   |                                 |  |  |  |  |
| Discharge to Community Hospital (step-down facility) | No                              |  |  |  |  |
| Centre for Epidemiological Studies Depression Scale  |                                 |  |  |  |  |

Abbreviations: aIRR: adjusted incidence rate ratio; CI: confidence interval; CCI: Charlson Comorbidity Index; FDW: foreign domestic worker

\*: Model adjusted for age, gender, ethnicity and ward class of the patient

#: Model adjusted for age, gender, ethnicity, ward class of the patient and length of stay of index stroke hospitalization
